# Supplementary material for: Distinct maturation, glucose metabolism, and inflammatory function of human monocytes-derived IDECs mediated by anti-IgE and Pam3CSK4 alone or in combination
Source: Frontiers journal article supplement (doi:10.3389/fimmu.2024.1403263), 2024-07-17

## Supplementary Material

### 1 Supplementary Data

**Figure S1** Pam3CSK4 alone or combination with anti-IgE downregulated the expression of FcεRIα in mo-IDECs *in vitro* by flow cytometry. **(A)** Specific gating strategies to identify FcεRIα expression on the surface of live mo-IDEC (CD14<sup>+</sup>CD1a<sup>+</sup>) cells after stimulation with different stimulus for 24 h as measured by flow cytometry (n = 5-6). **(B)** Expression of FcεRIα in mo-IDECs. Data were presented as mean ± SEM. Statistical significance were analyzed by the one-way ANOVA. <sup>ns</sup>  $p > 0.05$ , \*  $p < 0.05$  and \*\*  $p < 0.01$ .

**Figure S2** Overview of transcriptome profiling of mo-IDECs in response to Pam3CSK4 combination with anti-IgE *in vitro* by RNA-seq. **(A and B)** Volcano plots of DEGs in mo-IDECs, comparing the Pam3CSK4 combination with anti-IgE treatment and Pam3CSK4 and anti-IgE alone groups, respectively. Horizontal lines in volcano plots were cutoff for  $-\log_{10} 0.05$ . **(C)** Number of DEGs up- or down-regulated at each treatment group. **(D and F)** Dots diagram of the top 30 KEGG enrichment pathways of upregulated DEGs. **(E and G)** Dots diagram of the top 30 KEGG enrichment pathways of downregulated DEGs. The size of the dots represented the number of the pathway related genes (count). The  $p$ -values of each KEGG term were shown by color. The gene ratio described the ratio of the count to the number of all DEGs.

**Figure S3** Overview of metabolite profiling of mo-IDECs in response to Pam3CSK4 combination with anti-IgE *in vitro* by LC-MS/MS. **(A)** Number of up- or down-regulated metabolites at each treatment group. **(B and C)** Heat maps represented the differential metabolites among different treatment groups (n = 5). **(D and E)** KEGG pathway enrichment of dysregulated metabolites. BPG, 2,3-diphosphoglycerate. NADPH, nicotinamide adenine dinucleotide phosphate. UMP, uridine 5'-monophosphate.

**Figure S4** KEGG pathway enrichment of dysregulated metabolites in mo-IDECs after different stimulation treatments *in vitro* by LC-MS/MS. **(A-E)** KEGG classification according to the pathway types of dysregulated metabolites.

### 2 Supplementary Figures

Figure S1

**A**Gated from live CD14<sup>+</sup>CD1a<sup>+</sup> cells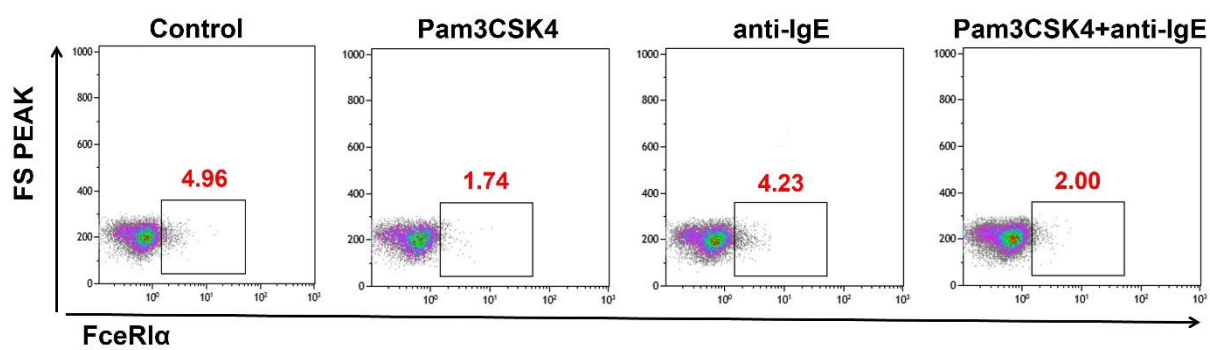**B**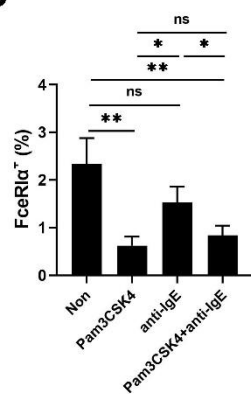

Figure S2

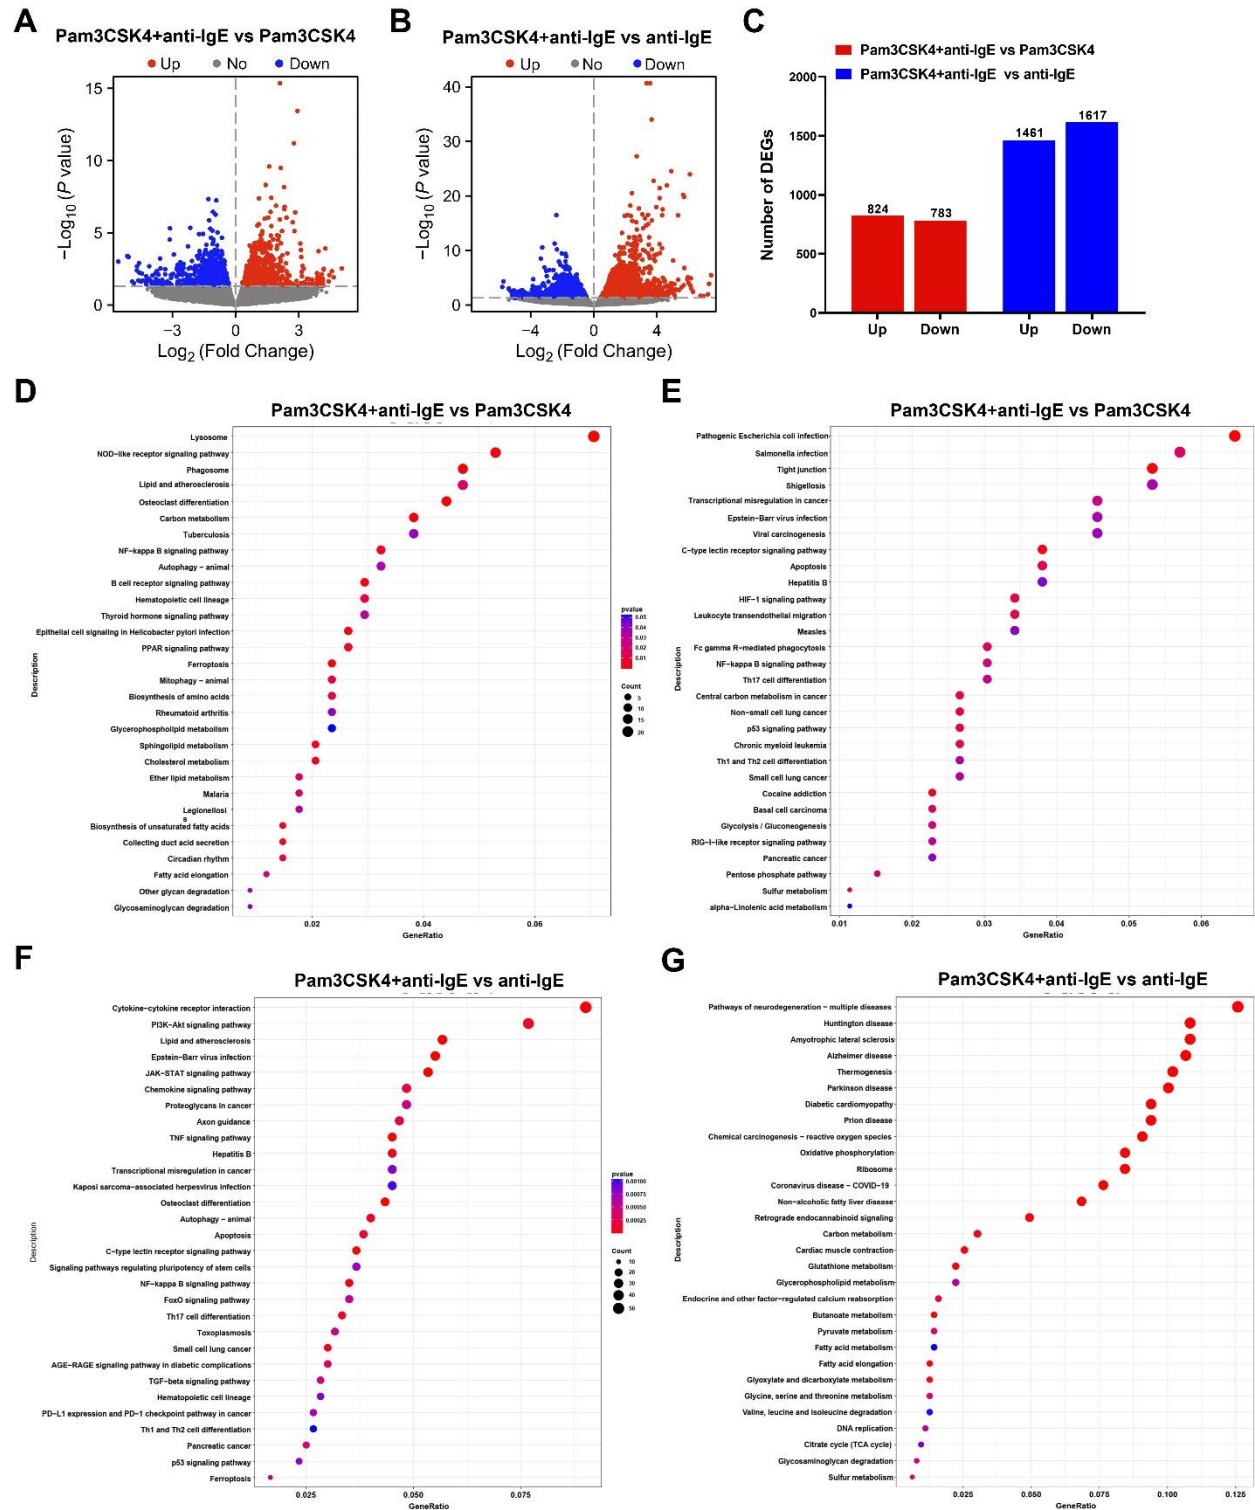

**A**

| Comparison                    | Up | Down |
|-------------------------------|----|------|
| Pam3CSK4+anti-IgE vs Pam3CSK4 | 2  | 14   |
| Pam3CSK4+anti-IgE vs anti-IgE | 8  | 1    |

**B**

**C**

**D**

**E**

# A

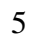

Supplement: Data_Sheet_1.pdf [file Data_Sheet_1.pdf]
