# Supplementary material for: Distinct maturation, glucose metabolism, and inflammatory function of human monocytes-derived IDECs mediated by anti-IgE and Pam3CSK4 alone or in combination
Source: Front Immunol. 2024 Jul 17;15:1403263. doi: 10.3389/fimmu.2024.1403263 (PMC11288808; doi:10.3389/fimmu.2024.1403263)
Supplement: Supplementary file 2 [file Table_1.xlsx]

## Sheet: 255 DEGs
	ID	SYMBOL	Change
1	ENSG00000007944	MYLIP	up
2	ENSG00000015568	RGPD5	up
3	ENSG00000019102	VSIG2	down
4	ENSG00000021762	OSBPL5	down
5	ENSG00000026652	AGPAT4	up
6	ENSG00000026751	SLAMF7	up
7	ENSG00000050130	JKAMP	down
8	ENSG00000050730	TNIP3	up
9	ENSG00000054219	LY75	up
10	ENSG00000064300	NGFR	up
11	ENSG00000064687	ABCA7	up
12	ENSG00000067248	DHX29	down
13	ENSG00000070190	DAPP1	up
14	ENSG00000070444	MNT	up
15	ENSG00000072274	TFRC	up
16	ENSG00000073756	PTGS2	up
17	ENSG00000075213	SEMA3A	up
18	ENSG00000075618	FSCN1	up
19	ENSG00000075651	PLD1	down
20	ENSG00000076382	SPAG5	down
21	ENSG00000079308	TNS1	up
22	ENSG00000080561	MID2	down
23	ENSG00000080603	SRCAP	up
24	ENSG00000082014	SMARCD3	down
25	ENSG00000085185	BCORL1	up
26	ENSG00000087253	LPCAT2	down
27	ENSG00000087589	CASS4	up
28	ENSG00000090376	IRAK3	up
29	ENSG00000099331	MYO9B	up
30	ENSG00000100036	SLC35E4	down
31	ENSG00000100266	PACSIN2	down
32	ENSG00000100336	APOL4	down
33	ENSG00000101265	RASSF2	up
34	ENSG00000103485	QPRT	down
35	ENSG00000104081	BMF	up
36	ENSG00000105327	BBC3	up
37	ENSG00000105711	SCN1B	up
38	ENSG00000105717	PBX4	up
39	ENSG00000105854	PON2	down
40	ENSG00000105889	STEAP1B	up
41	ENSG00000106483	SFRP4	up
42	ENSG00000107249	GLIS3	up
43	ENSG00000109099	PMP22	up
44	ENSG00000109654	TRIM2	up
45	ENSG00000111328	CDK2AP1	down
46	ENSG00000111676	ATN1	up
47	ENSG00000112096	SOD2	up
48	ENSG00000112195	TREML2	down
49	ENSG00000112394	SLC16A10	up
50	ENSG00000112511	PHF1	up
51	ENSG00000112659	CUL9	up
52	ENSG00000113108	APBB3	up
53	ENSG00000113532	ST8SIA4	up
54	ENSG00000114554	PLXNA1	up
55	ENSG00000114841	DNAH1	up
56	ENSG00000114982	KANSL3	up
57	ENSG00000115271	GCA	down
58	ENSG00000116017	ARID3A	up
59	ENSG00000116473	RAP1A	down
60	ENSG00000116750	UCHL5	down
61	ENSG00000117643	MAN1C1	down
62	ENSG00000118257	NRP2	up
63	ENSG00000118690	ARMC2	up
64	ENSG00000120694	HSPH1	down
65	ENSG00000120875	DUSP4	up
66	ENSG00000121900	TMEM54	up
67	ENSG00000122591	FAM126A	down
68	ENSG00000123427	EEF1AKMT3	up
69	ENSG00000123689	G0S2	up
70	ENSG00000124795	DEK	down
71	ENSG00000125457	MIF4GD	down
72	ENSG00000125657	TNFSF9	up
73	ENSG00000125775	SDCBP2	up
74	ENSG00000127328	RAB3IP	up
75	ENSG00000127951	FGL2	down
76	ENSG00000128203	ASPHD2	down
77	ENSG00000128283	CDC42EP1	up
78	ENSG00000130066	SAT1	up
79	ENSG00000130513	GDF15	down
80	ENSG00000130940	CASZ1	up
81	ENSG00000131669	NINJ1	up
82	ENSG00000132330	SCLY	up
83	ENSG00000132510	KDM6B	up
84	ENSG00000132514	CLEC10A	down
85	ENSG00000133246	PRAM1	down
86	ENSG00000134070	IRAK2	up
87	ENSG00000134072	CAMK1	down
88	ENSG00000134480	CCNH	down
89	ENSG00000134571	MYBPC3	up
90	ENSG00000134602	STK26	up
91	ENSG00000134871	COL4A2	up
92	ENSG00000135124	P2RX4	up
93	ENSG00000135596	MICAL1	up
94	ENSG00000135723	FHOD1	down
95	ENSG00000136048	DRAM1	up
96	ENSG00000136108	CKAP2	down
97	ENSG00000137078	SIT1	down
98	ENSG00000137502	RAB30	up
99	ENSG00000137834	SMAD6	up
100	ENSG00000137857	DUOX1	down
101	ENSG00000138639	ARHGAP24	up
102	ENSG00000139146	SINHCAF	up
103	ENSG00000139278	GLIPR1	down
104	ENSG00000139572	GPR84	up
105	ENSG00000140379	BCL2A1	up
106	ENSG00000140416	TPM1	down
107	ENSG00000140450	ARRDC4	down
108	ENSG00000141497	ZMYND15	up
109	ENSG00000143119	CD53	down
110	ENSG00000143549	TPM3	down
111	ENSG00000145390	USP53	up
112	ENSG00000145416	MARCH1	down
113	ENSG00000146830	GIGYF1	up
114	ENSG00000147224	PRPS1	down
115	ENSG00000147601	TERF1	down
116	ENSG00000148516	ZEB1	up
117	ENSG00000149212	SESN3	up
118	ENSG00000149269	PAK1	down
119	ENSG00000150048	CLEC1A	down
120	ENSG00000150681	RGS18	down
121	ENSG00000150977	RILPL2	up
122	ENSG00000151376	ME3	down
123	ENSG00000151490	PTPRO	down
124	ENSG00000151715	TMEM45B	down
125	ENSG00000153558	FBXL2	up
126	ENSG00000154102	C16orf74	down
127	ENSG00000154451	GBP5	down
128	ENSG00000154736	ADAMTS5	down
129	ENSG00000155090	KLF10	down
130	ENSG00000156011	PSD3	up
131	ENSG00000156234	CXCL13	down
132	ENSG00000157870	PRXL2B	up
133	ENSG00000157873	TNFRSF14	up
134	ENSG00000158485	CD1B	down
135	ENSG00000160602	NEK8	up
136	ENSG00000160781	PAQR6	up
137	ENSG00000161270	NPHS1	up
138	ENSG00000161921	CXCL16	up
139	ENSG00000162222	TTC9C	down
140	ENSG00000162367	TAL1	down
141	ENSG00000162745	OLFML2B	up
142	ENSG00000163082	SGPP2	up
143	ENSG00000163297	ANTXR2	up
144	ENSG00000163328	GPR155	down
145	ENSG00000163377	TAFA4	up
146	ENSG00000163389	POGLUT1	up
147	ENSG00000163435	ELF3	up
148	ENSG00000163606	CD200R1	down
149	ENSG00000163823	CCR1	down
150	ENSG00000163864	NMNAT3	down
151	ENSG00000163870	TPRA1	up
152	ENSG00000163947	ARHGEF3	down
153	ENSG00000164209	SLC25A46	down
154	ENSG00000164776	PHKG1	up
155	ENSG00000165272	AQP3	down
156	ENSG00000165389	SPTSSA	down
157	ENSG00000165556	CDX2	up
158	ENSG00000165609	NUDT5	down
159	ENSG00000165959	CLMN	up
160	ENSG00000166068	SPRED1	down
161	ENSG00000166428	PLD4	down
162	ENSG00000166523	CLEC4E	up
163	ENSG00000166833	NAV2	up
164	ENSG00000166845	C18orf54	up
165	ENSG00000166923	GREM1	up
166	ENSG00000167595	PROSER3	up
167	ENSG00000167680	SEMA6B	up
168	ENSG00000167874	TMEM88	up
169	ENSG00000167992	VWCE	up
170	ENSG00000168010	ATG16L2	up
171	ENSG00000168209	DDIT4	up
172	ENSG00000168268	NT5DC2	down
173	ENSG00000168461	RAB31	down
174	ENSG00000169220	RGS14	down
175	ENSG00000169231	THBS3	up
176	ENSG00000169251	NMD3	down
177	ENSG00000169299	PGM2	down
178	ENSG00000170458	CD14	up
179	ENSG00000171051	FPR1	up
180	ENSG00000171428	NAT1	down
181	ENSG00000171488	LRRC8C	down
182	ENSG00000171791	BCL2	up
183	ENSG00000171798	KNDC1	down
184	ENSG00000171812	COL8A2	down
185	ENSG00000172349	IL16	down
186	ENSG00000173198	CYSLTR1	down
187	ENSG00000173409	ARV1	down
188	ENSG00000173846	PLK3	up
189	ENSG00000175505	CLCF1	up
190	ENSG00000176046	NUPR1	down
191	ENSG00000179041	RRS1	down
192	ENSG00000179639	FCER1A	down
193	ENSG00000182612	TSPAN10	up
194	ENSG00000183780	SLC35F3	down
195	ENSG00000184163	C1QTNF12	up
196	ENSG00000184613	NELL2	up
197	ENSG00000184897	H1FX	up
198	ENSG00000184988	TMEM106A	down
199	ENSG00000185862	EVI2B	down
200	ENSG00000186074	CD300LF	up
201	ENSG00000186318	BACE1	down
202	ENSG00000186638	KIF24	down
203	ENSG00000187116	LILRA5	up
204	ENSG00000188343	FAM92A	down
205	ENSG00000188505	NCCRP1	up
206	ENSG00000188897	AC099489.1	up
207	ENSG00000196950	SLC39A10	down
208	ENSG00000197471	SPN	down
209	ENSG00000198133	TMEM229B	down
210	ENSG00000198203	SULT1C2	down
211	ENSG00000198668	CALM1	down
212	ENSG00000198814	GK	up
213	ENSG00000198829	SUCNR1	down
214	ENSG00000198844	ARHGEF15	down
215	ENSG00000198959	TGM2	up
216	ENSG00000205755	CRLF2	up
217	ENSG00000206567	AC022007.1	up
218	ENSG00000214114	MYCBP	down
219	ENSG00000223573	TINCR	up
220	ENSG00000226091	LINC00937	up
221	ENSG00000226450	CYP2D8P	up
222	ENSG00000228037	AL139246.3	up
223	ENSG00000228526	MIR34AHG	up
224	ENSG00000229754	CXCR2P1	down
225	ENSG00000230074	AL162231.2	up
226	ENSG00000230943	LINC02541	up
227	ENSG00000232004	CAP1P2	down
228	ENSG00000238164	TNFRSF14-AS1	up
229	ENSG00000241157	AC104763.1	down
230	ENSG00000242193	CRYZL2P	down
231	ENSG00000243566	UPK3B	up
232	ENSG00000243679	AC018638.5	up
233	ENSG00000243970	PPIEL	up
234	ENSG00000249437	NAIP	down
235	ENSG00000250571	GLI4	up
236	ENSG00000251136	AF117829.1	up
237	ENSG00000253738	OTUD6B-AS1	down
238	ENSG00000257058	AP001363.2	up
239	ENSG00000259207	ITGB3	up
240	ENSG00000261371	PECAM1	down
241	ENSG00000261971	MMP25-AS1	up
242	ENSG00000262001	DLGAP1-AS2	up
243	ENSG00000272195	AL356512.1	up
244	ENSG00000273045	C2orf15	down
245	ENSG00000273367	AL355472.3	down
246	ENSG00000274717	AL049757.1	up
247	ENSG00000275832	ARHGAP23	down
248	ENSG00000276805	AL133216.2	up
249	ENSG00000277075	HIST1H2AE	up
250	ENSG00000278727	AC000403.1	down
251	ENSG00000280287	AC131212.3	up
252	ENSG00000282608	ADORA3	down
253	ENSG00000286646	AL121933.2	down
254	ENSG00000287593	AL022724.3	up
255	ENSG00000287917	AP000944.7	up
